# Supplementary material
Source: PubMed Central journal article supplement (PMC2851917)
Supplement: 0903092107_pnas.0903092107_SI.pdf [file 0903092107_pnas.0903092107_SI.pdf]

# Supporting Information

Philip et al. 10.1073/pnas.0903092107

## SI Text

**Additional Computational Studies of Electronic Transitions in the *p*CA Chromophore of PYP.** A number of additional computational studies regarding electronic transitions in PYP have been reported (1–3). These studies focus on the energy gap between the  $S_0$  and  $S_1$  states.

**Involvement of Multiple Vibrational Modes.** We consider the case that two vibrational modes are coupled to the optical transition under study. This complication has been examined extensively in the case of stilbene (4). The  $S_0$  and  $S_1$  energy surfaces are now two-dimensional and are often approximated using two harmonic oscillators for the two vibrational modes involved. Franck-Condon factors now require the determination of the overlap of  $S_0$  and  $S_1$  wave functions in this space. The simplest case is that of  $\Delta E$ -tuning, in which the energy gap between the  $S_0$  and  $S_1$  energy surfaces is altered. In this case the predictions for the spectral effects remain unchanged compared to those for a single vibrational mode. If changes in the spectra involve  $R_e$ -tuning, different cases need to be considered. If the change in equilibrium nuclear geometry is limited to a single vibrational mode, again the spectral predictions remain unchanged. However, it is possible that changes in  $R_e$  occur along both vibrational modes, and that these two shifts are in opposite directions. Thus, these two changes in the energy surfaces would have opposite effects on the spectra. In the qualitative approach followed here, this would be expected to result in very small spectral changes that would be insufficient to explain the large changes in  $\lambda_{\max}^{\text{abs}}$  from 441 to 478 nm observed in the E46X set of mutants. Thus,  $R_e$ -tuning would only make a significant contribution to explaining the observed spectra if the shifts in  $R_e$  along one of the vibrational modes dominate the spectral effects (or if the changes in  $R_e$  along the two modes are in the same direction). In this case the vibrational mode along which the dominant shift in  $R_e$  occurs results in unchanged qualitative predictions for the spectra. Similar considerations apply to the case of W-tuning. If compensating changes in W occur along the two vibrational modes, this will result in a minimal contribution of W-tuning to the experimentally observed spectra. Only if the change in W along one vibrational mode is dominant (or if the shifts in W along the two axes are in the same direction, for example both involving an increase in the W of the  $S_1$  state), will this type of tuning be observed in the spectra, according to the qualitative predictions derived for the single oscillator case.

The above arguments remain valid if additional vibrational modes are considered. We conclude that the qualitative predictions based on the involvement of a harmonic well (i.e., a single vibrational mode) remain qualitatively valid if multiple vibrational modes are coupled to the optical transition. These considerations also reveal that if compensating spectral tuning effects occur along different vibrational modes, these will be largely spectrally silent, and can therefore not be derived from measurements of the electronic absorbance and fluorescence emission spectra.

**Spectral Tuning Due to Inhomogeneous Broadening Caused by Heterogeneity in *p*CA Configuration.** We consider the possibility that some of the changes in peak position, peak width, and peak asymmetry observed in the E46X mutants of PYP are caused by inhomogeneous broadening of the spectral bands due to heterogeneity in *p*CA configuration. This possible explanation of the spectral changes induced by the mutations implies that the various sub-

stitutions at position 46 have differential effects on the heterogeneity in *p*CA configuration. For example, it may be that one mutation causes heterogeneity in the strength of one of the active site hydrogen bonds known to cause spectral tuning, and results in a red-shift in  $\lambda_{\max}^{\text{abs}}$ . Another mutation may cause a change in the distribution of dihedral angles that describe the configuration of the *p*CA molecule in its protein binding pocket, and may result in a blue-shift in  $\lambda_{\max}^{\text{abs}}$ . We consider this possibility in the light of three experimental observations: that the values for  $\lambda_{\max}^{\text{fl}}$  are largely unaltered while the values for  $\lambda_{\max}^{\text{abs}}$  are strongly affected in the E46X mutants (Fig. 5), that the changes in the shape of the absorbance spectra are much larger than those for the fluorescence emission spectra (Fig. 4 B and C), and that a clear correlation is observed between the position and the width of the spectral bands (Fig. S1). These three patterns in the data would not be expected if heterogeneity in *p*CA configuration would be a major contributor to the observed spectral tuning effects. In the two examples described above, spectral tuning caused by structural heterogeneity in active site hydrogen bonding strength and *p*CA dihedral angle would not be expected to leave the position or shape of the fluorescence emission spectrum largely unchanged, or to change the width of the fluorescence emission spectrum according to a simple pattern. We conclude that the three stated regularities in the data argue against a major contribution of heterogeneity in *p*CA configuration to the spectral tuning effects observed in the E46X mutants.

**Spectral Effects of Increased Width of  $S_1$  Energy Surface.** We attribute the larger width of the PYP absorbance spectra compared to its fluorescence emission spectra to the increased width of the  $S_1$  energy surface compared to that of the  $S_0$  state based on the following reasoning. The intensity of electronic transitions from the  $S_0$  state to higher vibrational levels in the  $S_1$  state tends to become increasingly weak. This is caused by the closely spaced features of positive and negative amplitude in the corresponding  $S_1$  wave function, which are prone to cancel out net overlap with the much broader wave function for the vibrational ground state of  $S_0$ . In the case that the  $S_1$  energy surface becomes broader, the spacing of positive and negative features of the wave functions of all vibrational levels will become larger. This will tend to result in a larger net positive overlap between the  $S_0$  vibrational ground state and  $S_1$  vibrationally excited wave functions, and therefore an increase in the Franck-Condon factors for transitions to higher vibrational levels of  $S_1$ . This will result in contributions to the absorbance spectrum of transitions to a larger number of vibrational levels in the  $S_1$  state and a broadened absorbance band.

**Arguments Against  $R_e$  Tuning in the E46X Mutants.** Changes in  $R_e$  would result in two effects. First, it would cause  $\lambda_{\max}^{\text{abs}}$  and  $\lambda_{\max}^{\text{fl}}$  to be anticorrelated. This effect is not observed in the data (Fig. 5). Second, the shape of the absorbance and fluorescence emission spectra would be significantly and similarly altered. We used two measures to quantify the shape of the absorbance and emission spectra of the E46X mutants: the width of the spectra at 3/4 height and the asymmetry of the spectral bands. The width and asymmetry of the absorbance spectra change by a factor 2.05 and 2.35, respectively, in the E46X mutants. These values are 1.36 and 1.35 for the fluorescence emission spectra. This analysis demonstrates that the changes in shape of the absorbance spectra are significantly larger than those in the emission spectra in the E46X mutants. Thus, we conclude that substitutions at position 46 do not cause significant changes in

the difference between the  $R_e$  values for the  $S_0$  and  $S_1$  states of the  $pCA$  chromophore in PYP.

**Effects of Substitutions on  $pCA$  Charge Distribution and  $W$  of  $S_1$ .** Substitutions of Glu46 to Arg, Lys, Asp, and Pro cause a blue-shift of the  $\lambda_{\text{max}}^{\text{abs}}$ , corresponding to a broadening of the  $S_1$  energy surface. All other substitutions (except Tyr) cause red-shifts (particularly Ile, Val, Met, and Leu) (5), corresponding to a narrowing of  $S_1$ . How do these substitutions alter the  $W$  of the  $S_1$  state? One possibility for the latter set of mutants is that the removal of the short, strong hydrogen bond between the side chain of Glu46 and the deprotonated phenolic oxygen of the  $pCA$  in wt PYP (6) is involved. The loss of this hydrogen bond in the mutants could alter the force constants of vibrational modes in the  $pCA$  that are coupled to the optical transition, resulting in a change in the  $W$  of the  $S_1$  energy surface. Since the  $pCA$  chromophore in PYP is a charged molecule buried within the protein, changes in hydrogen bonding or the vicinity of charged side chains can significantly alter the charge distribution of the  $pCA$ , either in the  $S_0$  or  $S_1$  state. The formation of the  $S_1$  state results in a large charge redistribution in the  $pCA$  (7), and a slight weakening of the hydrogen bond between Glu46 and the  $pCA$  (8). Thus, the removal of the hydrogen bond between the phenolic oxygen of the  $pCA$  and residue 46 in the mutants is likely to affect the  $W$  of the  $S_0$  and  $S_1$  states differently. Particularly the bond order of the isomerizing C – C bond in the  $pCA$  molecule could be affected by a change in excited state charge distribution caused by the mutations. In this proposal the charged residues Arg, Lys, and Asp would have an effect on  $pCA$  charge distribution—and thus C – C bond order—in the  $S_1$  state opposite to that of weakening of the hydrogen bond between residue 46 and the  $pCA$ : the Arg and Lys substitutions could reduce conjugation in the chromophore by localizing electrons on the phenolic oxygen of the  $pCA$ , while the Asp substitution would result in charge localization on its carbonyl oxygen. Typical C – C stretching and C = C stretching frequencies of 1,150 and 1,550  $\text{cm}^{-1}$  yield an estimation for the change in C – C bond order of  $\sim 100 \text{ cm}^{-1}$  as the factor responsible for observed changes in  $\lambda_{\text{max}}^{\text{abs}}$  in the E46X mutants. The involvement of a vibrational mode with this frequency in the absorbance spectrum of PYP is supported by the vibrational fine structure of PYP ( $\sim 1,300 \text{ cm}^{-1}$ ) reported from low temperature studies (9), the observation that a band at 1,558  $\text{cm}^{-1}$  is the strongest signal in the resonance Raman spectrum of PYP (10), and the involvement of a mode at 1,550  $\text{cm}^{-1}$  in the optical transition of stilbene (4).

**Mutagenesis and Batch Purification of PYP.** Mutagenesis of PYP was performed with primers degenerate at position 46 (5'-ATC CTT CAG TAC AAC GCC GCG NNN GGC GAC ATC ACC GGC CGC GAC-3' and complement) as described in ref. 5. A pQE-80A plasmid (QIAGEN) containing the *ppy* gene inserted

between *Bam*HI and *Hind*III sites was used as the template. All mutants were confirmed by DNA sequencing and transformed into *E. coli* BL21. Colonies of the 20 *E. coli* strains were grown in deep-well microplates and induced with 1 mM IPTG.

For batch purification *E. coli* BL21 containing the pQE80-PYP plasmid was grown in overnight cultures that were used to inoculate 1.5 L expression cultures the following day. These were grown at 37 °C to an optical density at 600 nm of 0.6. IPTG was added to a final concentration of 1 mM. After 4–5 h, the cells were harvested by centrifugation at 4,000 g for 20 min. At this point the cells could be frozen at –80 °C for use at a later time. Otherwise they were resuspended in 3–5 mL of lysis buffer (50 mM  $\text{NaH}_2\text{PO}_4$ , 500 mM NaCl, 5 mM imidazole, pH 8.0). Lysozyme was added to a concentration of 1 mg/mL and the mixture was incubated on ice for 30 min. The cells were broken by sonication and the cellular debris was spun down at 10,000 g for 30 min. The supernatant was collected and the PYP was reconstituted with chromophore by adding  $pCA$  ( $p$ -coumaric acid) anhydride (11) until the visible absorbance peak was no longer observed to increase.  $\text{NH}_4\text{SO}_4$  was added to 50% saturation. The precipitate was spun down at 20,000 g for 15 min. The supernatant was collected and dialyzed with lysis buffer. Afterwards this was mixed with 5–15 mL of 50% Ni-NTA agarose suspension (QIAGEN) and stirred for 1 h at 4 °C. The agarose suspension was poured into a column and washed with lysis buffer containing 10 mM imidazole. The protein was eluted from the column with an imidazole step gradient. The sample was then applied onto a DEAE Sepharose Fast Flow (Amersham) column and eluted with a NaCl gradient. After that a third purification step was performed using gel filtration chromatography with Superdex 200 in an HK 16/60 column (Amersham).

**Ultrafast Pump-Probe Spectroscopy.** We used a homebuilt 2 kHz amplified Ti:sapphire laser system, which produces 50 fs, 50  $\mu\text{J}$  pulses centered at 800 nm. In the pump-probe measurements, the pump beam was obtained by second-harmonic generation in a 200  $\mu\text{m}$  thick Type-I beta barium borate (BBO) crystal (Quantum Technology). A tunable probe beam is produced with an optical parametric amplifier (OPA) yielding 10–50 nJ, 80–90 fs pulses tunable from 450–520 nm. The pump and probe pulses were compressed and precompensated for material dispersion from transmissive optics in the pump-probe setup using separate prism compressors. A 30 cm focal length spherical mirror and a 20 cm focal length achromatic lens were used to focus the pump (100 nJ) and probe ( $\sim 5$  nJ) pulses. For all pump-probe experiments, the sample was contained in a spinning cell rotated at 10 Hz and had a 0.2 mm path length. For wt PYP and E46Y PYP a 400 nm probe beam was used; for wt PYP and the E46K and E46Y mutants probe beams at 490 nm, 505 nm, and 515 nm were used; finally E46H PYP was probed at 505 nm.

- Sergi A, Gruning M, Ferrario M, Buda F (2001) Density functional study of the photoactive yellow protein's chromophore. *J Phys Chem B* 105:4386–4391.
- Groenhof G, Lensink MF, Berendsen HJC, Snijders JG, Mark AE (2002) Signal transduction in the photoactive yellow protein. I. Photon absorption and the isomerization of the chromophore. *Proteins Struct Funct Genet* 48:202–211.
- He Z, Martin CH, Birge R, Freed KF (2000) Theoretical studies on excited states of a phenolate anion in the environment of photoactive yellow protein. *J Phys Chem A* 104:2939–2952.
- Chiang W-Y, Laane J (1994) Fluorescence spectra and torsional potential functions for *trans*-stilbene in its  $S_0$  and  $S_1$  ( $\pi$ ,  $\pi^*$ ) electronic states. *J Phys Chem* 100:8755–8767.
- Phillip AF, Eisenman KT, Papadantonakis GA, Hoff WD (2008) Functional tuning of photoactive yellow protein by active site residue 46. *Biochemistry* 47:13800–13810.
- Anderson S, Crossoon S, Moffat K (2004) Short hydrogen bonds in photoactive yellow protein. *Acta Crystallogr D* 60:1008–1016.
- Premvardhan LL, van der Horst MA, Hellingwerf KJ, van Grondelle R (2003) Stark spectroscopy on photoactive yellow protein, E46Q, and a nonisomerizing derivative, probes photo-induced charge motion. *Biophys J* 84:3226–3239.
- Groot ML, van Wilderen LJGW, Larsen DS, van der Horst MA, van Stokkum IHM, Hellingwerf KJ, van Grondelle R (2003) Initial steps of signal generation in photoactive yellow protein revealed with femtosecond mid-infrared spectroscopy. *Biochemistry* 42:10054–10059.
- Hoff WD, Kwa SLS, Van Grondelle R, Hellingwerf KJ (1992) Low temperature absorption and fluorescence spectroscopy of the yellow protein from *Ectothiorhodospira halophila*. *Photochem Photobiol* 56:529–539.
- Kim M, Mathies RA, Hoff WD, Hellingwerf KJ (1995) Resonance Raman evidence that the thioester-linked 4-hydroxycinnamyl chromophore of photoactive yellow protein is deprotonated. *Biochemistry* 34:12669–12672.
- Imamoto Y, Ito Y, Kataoka M, Tokunaga, F (1995) Reconstitution of photoactive yellow protein from apoprotein and  $p$ -coumaric acid derivatives. *FEBS Lett* 374:157–160.
